# Supplementary material for: Elastokines are Associated with a Poor Prognosis in Idiopathic Pulmonary Fibrosis
Source: Research Square preprint supplement (doi:10.21203/rs.3.rs-7881084/v1), 2025-12-30
Supplement: Supplementary file 1 [file e2040e3e5cc795a865635f49.pdf]

## Supplemental Figure 1

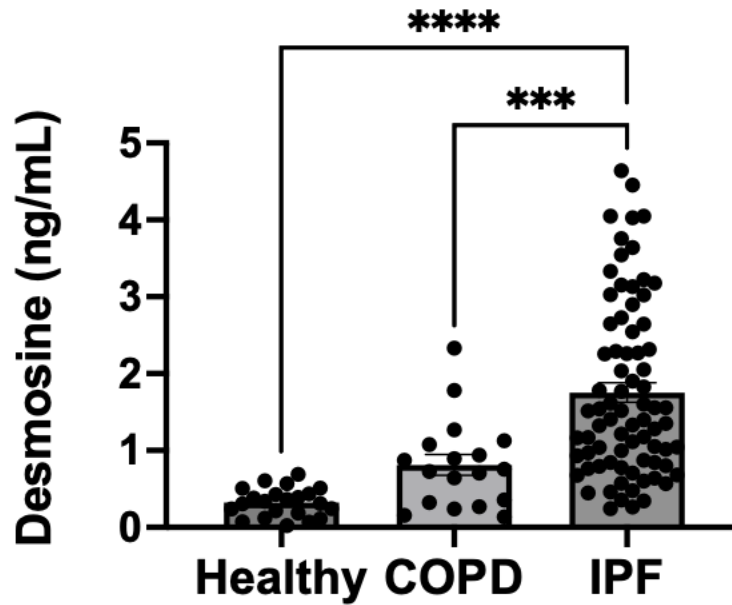

**Supplemental Figure 1: Patients with IPF have increased concentrations of urinary desmosine compared to healthy volunteers and patients with COPD.** Urine samples were collected from subjects, and desmosine concentrations (ng/mL) were determined according to the ELISA analysis. Data are presented as individual values  $\pm$  SEM. \*\*\*\* $p < 0.0001$ , \*\*\* $p = 0.0007$ .

## Supplemental Figure 2

| Type III Tests of Fixed Effects |           |           |         |        |
|---------------------------------|-----------|-----------|---------|--------|
| Effect                          | Num<br>DF | Den<br>DF | F Value | Pr > F |
| Age                             | 1         | 92        | 0.14    | 0.7047 |
| diag                            | 1         | 92        | 6.00    | 0.0162 |

| diag Least Squares Means |          |                   |    |         |         |       |        |        |
|--------------------------|----------|-------------------|----|---------|---------|-------|--------|--------|
| diag                     | Estimate | Standard<br>Error | DF | t Value | Pr >  t | Alpha | Lower  | Upper  |
| IPF                      | 1.7166   | 0.1325            | 92 | 12.96   | <.0001  | 0.05  | 1.4534 | 1.9797 |
| COPD                     | 0.9246   | 0.2911            | 92 | 3.18    | 0.0020  | 0.05  | 0.3465 | 1.5027 |

| Differences of diag Least Squares Means |      |          |                   |    |         |         |       |        |        |
|-----------------------------------------|------|----------|-------------------|----|---------|---------|-------|--------|--------|
| diag                                    | diag | Estimate | Standard<br>Error | DF | t Value | Pr >  t | Alpha | Lower  | Upper  |
| IPF                                     | COPD | 0.7920   | 0.3234            | 92 | 2.45    | 0.0162  | 0.05  | 0.1496 | 1.4343 |

**Supplemental Figure 2: When adjusted for age, EDPs remain elevated in patients with IPF compared to those with COPD.** When adjusted for age, the mean EDP level in IPF is 1.72 [95% CI 1.45-1.98] and in people with COPD is 0.93 [95% CI 0.35-1.5], or 0.79 lower. The p value for the statistical difference between the age-adjusted means is 0.0162.
